# Supplementary material for: Three-dimensional combined biomarkers assay could improve diagnostic accuracy for gastric cancer
Source: PubMed Central journal article supplement (PMC5599671; doi:10.1038/s41598-017-12022-1), 2017-09-14
Supplement: 41598_2017_12022_MOESM1_ESM.pdf [file 41598_2017_12022_MOESM1_ESM.pdf]

# Three-dimensional combined biomarkers assay could improve diagnostic accuracy for gastric cancer

Liping Sun<sup>1\*</sup>, Huakang Tu<sup>1,2\*</sup>, Tiejun Chen<sup>1,3</sup>, Quan Yuan<sup>1,4</sup>, Jingwei Liu<sup>1</sup>,  
Nannan Dong<sup>1</sup>, Yuan Yuan<sup>1#</sup>

Supplementary table 1. Selected demographic characteristics and serum biomarker levels  
in atrophic gastritis and controls

| factor                    | Controls<br>(n=663) | Atrophic gastritis<br>(n=663) | <i>P</i> -value <sup>a</sup> |
|---------------------------|---------------------|-------------------------------|------------------------------|
| Age (years,<br>mean ± SD) | 54.3±9.0            | 55.0±9.9                      | 0.190                        |
| Gender                    |                     |                               |                              |
| Male                      | 328(49.5%)          | 328(49.5%)                    | 1.000                        |
| Female                    | 335(50.5%)          | 335(50.5%)                    |                              |
| PGI (ng/mL)               | 94.1±51.9           | 102.4±59.2                    | <b>0.007</b>                 |
| PGII (ng/mL)              | 9.3±10.8            | 15.2±11.4                     | <b>&lt;0.001</b>             |
| PGI/II                    | 13.3±6.8            | 8.9±6.1                       | <b>&lt;0.001</b>             |
| HpAb (EIU)                | 20±23.1             | 50.7±37.4                     | <b>&lt;0.001</b>             |
| OPN (ng/mL)               | 2.1±1.9             | 2.4±2.2                       | <b>0.002</b>                 |

<sup>a</sup>*P*-value: atrophic gastritis vs controls.

Supplementary table 2. diagnostic efficacy of PGI/II, HpAb, OPN individually and combined for atrophic gastritis detection

| Biomarker       | cutoff | Sensitivity (%) | Specificity (%) | YD    |
|-----------------|--------|-----------------|-----------------|-------|
| PGI/II          | 7.0    | 48.3            | 85.3            | 0.336 |
| HpAb (EIU)      | 33.9   | 59.3            | 81.9            | 0.412 |
| OPN (ng/ml)     | 1.2    | 70.2            | 42.4            | 0.126 |
| PGI/II- HpAb    | 0.477  | 70.0            | 75.7            | 0.457 |
| OPN- HpAb       | 0.392  | 70.0            | 69.1            | 0.391 |
| PGI/II-OPN      | 0.407  | 70.0            | 66.2            | 0.362 |
| PGI/II-OPN-HpAb | 0.411  | 70.0            | 72.9            | 0.429 |

<sup>a</sup>The cutoff value was selected as the diagnosis point of Sen>70% and the highest Sep.
